# Supplementary material for: Development and analytical validation of a next-generation sequencing based microsatellite instability (MSI) assay
Source: PubMed Central journal article supplement (PMC6718258; doi:10.18632/oncotarget.27142), 2019-08-27
Supplement: oncotarget-10-5181-s001.pdf [file oncotarget-10-5181-s001.pdf]

## Development and analytical validation of a next-generation sequencing based microsatellite instability (MSI) assay

### SUPPLEMENTARY MATERIALS

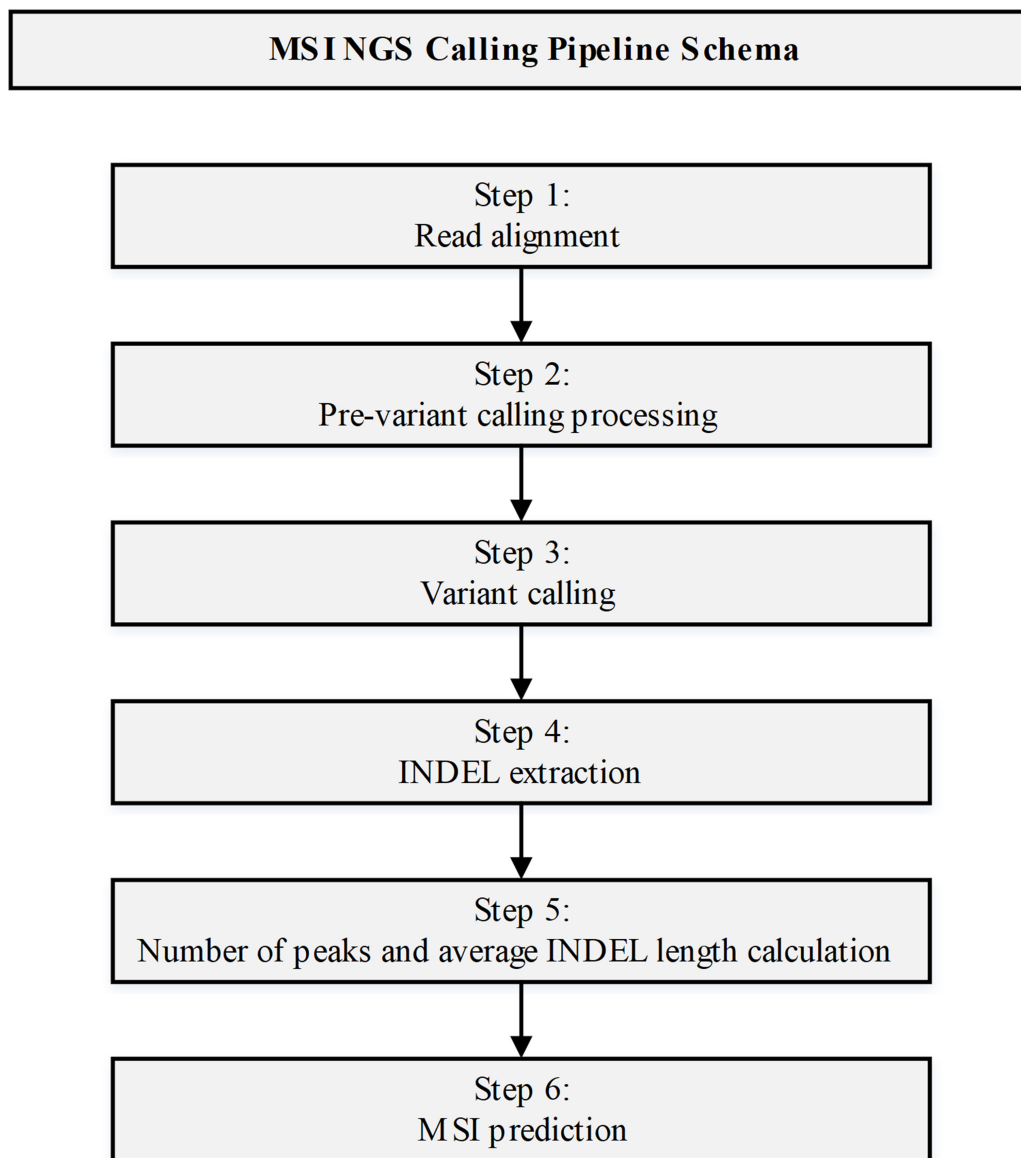

**Supplementary Figure 1: Custom bioinformatics pipeline for identification of microsatellite instability using NGS.** The pipeline was designed to read “.fastq” files of all samples from a sequencing run and conduct sequence alignment, variant calling, indel extraction, indel length and number of peaks calculation and MSI prediction.

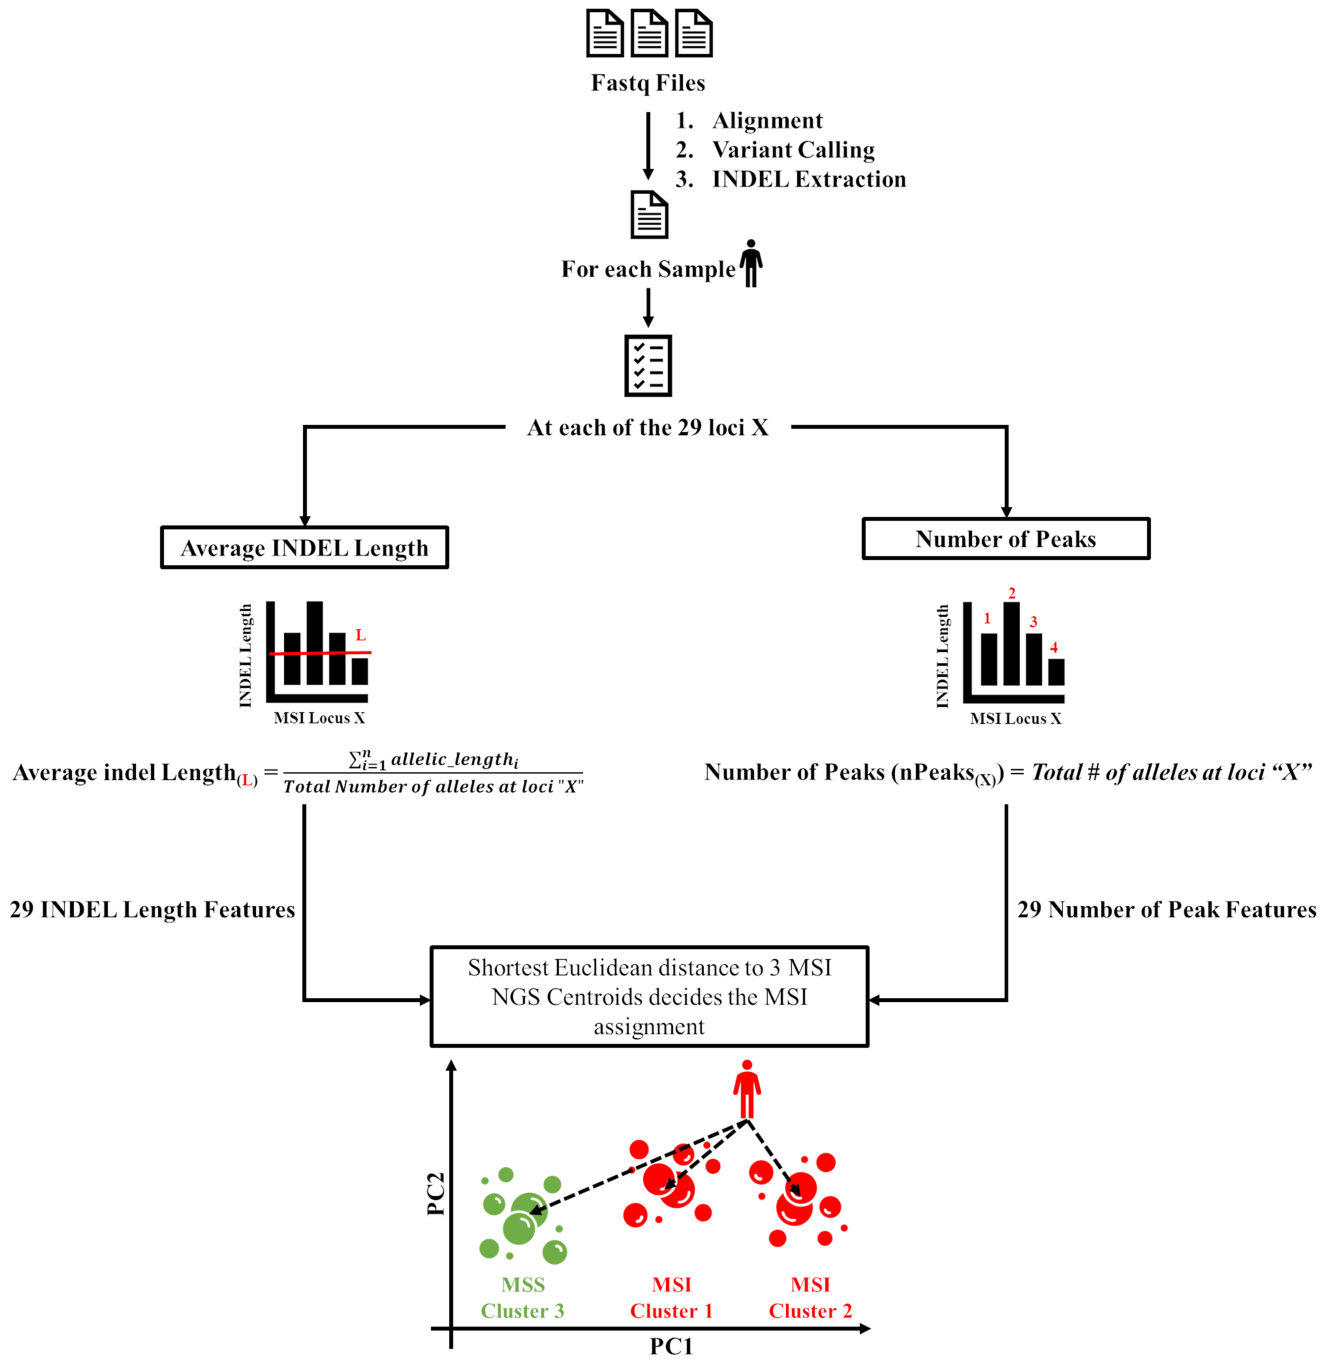

Supplementary Figure 2: A representative flow chart depicting the overview of MSI NGS prediction method.

**Supplementary Table 1: TCGA filtered INDEL calls for MSI NGS panel development**

| CHR   | POS       | REF | ALT     | ALT LEN | VAR TYPE | Selected | Proportion of MSI Negative | Proportion of MSI Positive | Fisher's Exact Test, <i>p</i> |
|-------|-----------|-----|---------|---------|----------|----------|----------------------------|----------------------------|-------------------------------|
| chr2  | 62063093  | T   | AAAAA   | 5       | DEL      | Y        | 0                          | 7                          | 4.91207E-07                   |
| chr6  | 111329221 | C   | TTTTT   | 5       | DEL      | Y        | 0                          | 7                          | 4.91207E-07                   |
| chr7  | 102727051 | C   | TTTTT   | 5       | DEL      | Y        | 0                          | 7                          | 4.91207E-07                   |
| chr10 | 112360315 | G   | TTTTT   | 5       | DEL      | Y        | 0                          | 7                          | 4.91207E-07                   |
| chr11 | 14539315  | T   | AAAAA   | 5       | DEL      | Y        | 0                          | 7                          | 4.91207E-07                   |
| chr12 | 112893675 | G   | TTTTT   | 5       | DEL      | Y        | 0                          | 7                          | 4.91207E-07                   |
| chr14 | 66964769  | G   | TTTTT   | 5       | DEL      | Y        | 0                          | 7                          | 4.91207E-07                   |
| chr16 | 11064865  | A   | TTTTTT  | 6       | DEL      | Y        | 0                          | 7                          | 4.91207E-07                   |
| chr17 | 19314917  | C   | TTTTT   | 5       | DEL      | Y        | 0                          | 7                          | 4.91207E-07                   |
| chr19 | 21561408  | C   | TTTTT   | 5       | DEL      | Y        | 0                          | 7                          | 4.91207E-07                   |
| chrX  | 48243983  | C   | TTTTT   | 5       | DEL      | Y        | 0                          | 7                          | 4.91207E-07                   |
| chr3  | 43607224  | C   | AAAAA   | 5       | DEL      | Y        | 1                          | 7                          | 3.92966E-06                   |
| chr12 | 8286096   | A   | TTTTT   | 5       | DEL      | Y        | 1                          | 7                          | 3.92966E-06                   |
| chr1  | 7913184   | C   | AAAAA   | 5       | DEL      | Y        | 0                          | 6                          | 1.1789E-05                    |
| chr1  | 16388875  | G   | CCCCC   | 5       | DEL      | Y        | 0                          | 6                          | 1.1789E-05                    |
| chr1  | 74901739  | C   | TTTTT   | 5       | DEL      | Y        | 0                          | 6                          | 1.1789E-05                    |
| chr1  | 200312546 | C   | AAAAA   | 5       | DEL      | Y        | 0                          | 6                          | 1.1789E-05                    |
| chr1  | 231094050 | G   | AAAAA   | 5       | DEL      | Y        | 0                          | 6                          | 1.1789E-05                    |
| chr2  | 91872178  | A   | TTTTTT  | 6       | DEL      | Y        | 0                          | 6                          | 1.1789E-05                    |
| chr2  | 91872178  | A   | TTTTTTT | 7       | DEL      | Y        | 0                          | 6                          | 1.1789E-05                    |
| chr2  | 108479622 | C   | TTTTT   | 5       | DEL      | Y        | 0                          | 6                          | 1.1789E-05                    |
| chr2  | 203676382 | C   | AAAAA   | 5       | DEL      | Y        | 0                          | 6                          | 1.1789E-05                    |
| chr2  | 203676382 | C   | AAAAAA  | 6       | DEL      | Y        | 0                          | 6                          | 1.1789E-05                    |
| chr2  | 234178624 | C   | TTTTT   | 5       | DEL      | Y        | 0                          | 6                          | 1.1789E-05                    |
| chr3  | 129168854 | C   | TTTTT   | 5       | DEL      | Y        | 0                          | 6                          | 1.1789E-05                    |
| chr3  | 132221076 | C   | TTTTT   | 5       | DEL      | Y        | 0                          | 6                          | 1.1789E-05                    |
| chr4  | 38134423  | G   | TTTTT   | 5       | DEL      | Y        | 0                          | 6                          | 1.1789E-05                    |
| chr4  | 47856957  | C   | AAAAA   | 5       | DEL      | Y        | 0                          | 6                          | 1.1789E-05                    |
| chr5  | 70888665  | G   | TTTTT   | 5       | DEL      | Y        | 0                          | 6                          | 1.1789E-05                    |
| chr5  | 96093391  | G   | TTTTT   | 5       | DEL      | Y        | 0                          | 6                          | 1.1789E-05                    |
| chr5  | 134106506 | C   | AAAAA   | 5       | DEL      | Y        | 0                          | 6                          | 1.1789E-05                    |
| chr6  | 84061864  | G   | AAAAA   | 5       | DEL      | Y        | 0                          | 6                          | 1.1789E-05                    |
| chr8  | 59060725  | G   | TTTTT   | 5       | DEL      | Y        | 0                          | 6                          | 1.1789E-05                    |
| chr9  | 77550305  | C   | AAAAA   | 5       | DEL      | Y        | 0                          | 6                          | 1.1789E-05                    |
| chr9  | 86617961  | C   | TTTTT   | 5       | DEL      | Y        | 0                          | 6                          | 1.1789E-05                    |
| chr12 | 89853387  | C   | AAAAA   | 5       | DEL      | Y        | 0                          | 6                          | 1.1789E-05                    |
| chr14 | 75181481  | C   | AAAAA   | 5       | DEL      | Y        | 0                          | 6                          | 1.1789E-05                    |
| chr15 | 56243792  | T   | AAAAA   | 5       | DEL      | Y        | 0                          | 6                          | 1.1789E-05                    |
| chr16 | 11064865  | A   | TTTTT   | 5       | DEL      | Y        | 0                          | 6                          | 1.1789E-05                    |
| chr16 | 75674252  | T   | AAAAAA  | 6       | DEL      | Y        | 0                          | 6                          | 1.1789E-05                    |
| chr17 | 36374963  | T   | AAAAA   | 5       | DEL      | Y        | 0                          | 6                          | 1.1789E-05                    |
| chr18 | 649879    | C   | TTTTT   | 5       | DEL      | Y        | 0                          | 6                          | 1.1789E-05                    |
| chr19 | 21561408  | C   | TTTTTT  | 6       | DEL      | Y        | 0                          | 6                          | 1.1789E-05                    |
| chr19 | 21561408  | C   | TTTTTTT | 7       | DEL      | Y        | 0                          | 6                          | 1.1789E-05                    |
| chr20 | 3298881   | C   | AAAAAA  | 6       | DEL      | Y        | 0                          | 6                          | 1.1789E-05                    |
| chr22 | 44083327  | G   | TTTTTT  | 6       | DEL      | Y        | 0                          | 6                          | 1.1789E-05                    |
| chrX  | 129630732 | T   | AAAAA   | 5       | DEL      | Y        | 0                          | 6                          | 1.1789E-05                    |

**Supplementary Table 2: MSI NGS peak number identified in training set.** See Supplementary\_Table\_2

**Supplementary Table 3: MSI NGS loci prevalence in training set.** See Supplementary\_Table\_3

**Supplementary Table 4: MSI NGS centroid values for each locus.** See Supplementary\_Table\_4

**Supplementary Table 5: MSI NGS prediction in training set**

| Sample Name       | Tissue Type                        | Prediction Cluster | MSI NGS    | MSI PCR      | Cluster 1   | Cluster 2   | Cluster 3   | Difference (Cluster 3 and Cluster 1) |
|-------------------|------------------------------------|--------------------|------------|--------------|-------------|-------------|-------------|--------------------------------------|
| RS-2774587        | CRC                                | 1                  | MSI-H      | MSI-H        | 4.835573058 | 12.31609386 | 5.363296362 | -0.527723303                         |
| RS-2774589        | CRC                                | 1                  | MSI-H      | MSI-H        | 6.440252143 | 7.260850683 | 12.70196987 | -6.261717728                         |
| RS-2774606        | CRC                                | 1                  | MSI-H      | MSI-H        | 4.576201305 | 9.95291329  | 8.510299989 | -3.934098684                         |
| RS-2774607        | endometrial endometrioid carcinoma | 1                  | MSI-H      | MSI-H        | 5.184442643 | 6.838563909 | 11.81155411 | -6.627111472                         |
| RS-2774608        | endometrial endometrioid carcinoma | 1                  | MSI-H      | MSI-H        | 4.25612464  | 11.75545541 | 6.325832885 | -2.069708245                         |
| RS-2774617        | endometrial endometrioid carcinoma | 1                  | MSI-H      | MSI-H        | 5.103702614 | 10.39349847 | 8.293174435 | -3.189471821                         |
| RS-2774619        | endometrial endometrioid carcinoma | 1                  | MSI-H      | MSI-H        | 4.64416444  | 10.55630954 | 8.478582924 | -3.834418484                         |
| RS-2774622        | endometrial endometrioid carcinoma | 1                  | MSI-H      | MSI-H        | 4.7274224   | 7.474941815 | 10.90817491 | -6.180752514                         |
| RS-2774623        | endometrial endometrioid carcinoma | 1                  | MSI-H      | MSI-H        | 4.188269876 | 11.28216122 | 6.998993768 | -2.810723891                         |
| RS-2774585        | CRC                                | 2                  | MSI-H      | MSI-H        | 7.470995279 | 5.063026601 | 14.17213793 | -6.701142654                         |
| RS-2774588        | CRC                                | 2                  | MSI-H      | MSI-H        | 11.39921236 | 6.244021924 | 18.08750673 | -6.688294373                         |
| RS-2774591        | CRC                                | 2                  | MSI-H      | MSI-H        | 11.21346738 | 5.451079785 | 17.78343772 | -6.569970342                         |
| RS-2774592        | CRC                                | 2                  | MSI-H      | MSI-H        | 7.242926136 | 6.315510611 | 14.06792996 | -6.825003828                         |
| RS-2774601        | CRC                                | 2                  | MSI-H      | MSI-H        | 12.46181411 | 5.306446321 | 19.58624497 | -7.124430851                         |
| RS-2774602        | CRC                                | 2                  | MSI-H      | MSI-H        | 10.94840166 | 4.509762888 | 17.68877401 | -6.740372356                         |
| RS-2774604        | CRC                                | 2                  | MSI-H      | MSI-H        | 9.882771489 | 4.109701889 | 16.89284147 | -7.010069985                         |
| RS-2774605        | CRC                                | 2                  | MSI-H      | MSI-H        | 10.54970316 | 5.699110718 | 16.91761036 | -6.367907191                         |
| RS-2774618        | CRC                                | 2                  | MSI-H      | MSI-H        | 11.27156501 | 5.33534894  | 18.23691279 | -6.965347773                         |
| RS-2774621        | CRC                                | 2                  | MSI-H      | MSI-H        | 8.438478261 | 5.608506241 | 14.89747029 | -6.458992029                         |
| RS-2774590        | stomach adenocarcinoma             | 2                  | MSI-H      | MSI-H        | 9.760559566 | 5.230741893 | 16.08438031 | -6.323820742                         |
| <b>RS-2774620</b> | CRC                                | 3                  | <b>MSS</b> | <b>MSI-H</b> | 5.990155449 | 13.69119603 | 4.082762283 | 1.907393165                          |
| RS-2774633        | CRC                                | 3                  | MSS        | MSS          | 7.26326176  | 14.87684421 | 4.023329225 | 3.239932534                          |
| RS-2774635        | CRC                                | 3                  | MSS        | MSS          | 9.082279676 | 17.31020819 | 3.211384733 | 5.870894943                          |
| RS-2774636        | CRC                                | 3                  | MSS        | MSS          | 9.08925816  | 16.98843942 | 3.436848372 | 5.652409789                          |
| RS-2774637        | CRC                                | 3                  | MSS        | MSS          | 8.291331424 | 15.90923716 | 5.566203222 | 2.725128202                          |
| RS-2774638        | CRC                                | 3                  | MSS        | MSS          | 10.4569478  | 18.39947052 | 4.880597706 | 5.576350095                          |
| RS-2774639        | CRC                                | 3                  | MSS        | MSS          | 9.527773375 | 17.08387243 | 5.214356507 | 4.313416868                          |
| RS-2774640        | CRC                                | 3                  | MSS        | MSS          | 10.41695437 | 18.13683369 | 4.426673359 | 5.990281015                          |
| RS-2774649        | CRC                                | 3                  | MSS        | MSS          | 7.649347544 | 15.33881194 | 3.594249033 | 4.055098511                          |
| RS-2774651        | CRC                                | 3                  | MSS        | MSS          | 8.959829651 | 16.56420867 | 4.149624156 | 4.810205494                          |
| RS-2774652        | CRC                                | 3                  | MSS        | MSS          | 8.390569571 | 16.23562533 | 3.94392846  | 4.446641111                          |
| RS-2774653        | CRC                                | 3                  | MSS        | MSS          | 8.352232408 | 16.36841789 | 3.392713983 | 4.959518425                          |
| RS-2774654        | CRC                                | 3                  | MSS        | MSS          | 9.544925699 | 17.43988284 | 4.603937847 | 4.940987852                          |
| RS-2774655        | CRC                                | 3                  | MSS        | MSS          | 8.285872423 | 15.84275058 | 4.659831833 | 3.62604059                           |
| RS-2774663        | CRC                                | 3                  | MSS        | MSS          | 9.697061418 | 17.39110013 | 4.335416844 | 5.361644574                          |
| RS-2774664        | CRC                                | 3                  | MSS        | MSS          | 8.381345704 | 16.02327933 | 3.740496576 | 4.640849128                          |
| RS-2774665        | CRC                                | 3                  | MSS        | MSS          | 7.542433607 | 15.4986641  | 3.139029609 | 4.403403999                          |
| RS-2774666        | CRC                                | 3                  | MSS        | MSS          | 7.85441762  | 15.53540397 | 3.264374347 | 4.590043274                          |
| RS-2774667        | CRC                                | 3                  | MSS        | MSS          | 10.15264063 | 17.83439564 | 4.815512909 | 5.337127721                          |
| RS-2774668        | CRC                                | 3                  | MSS        | MSS          | 9.46055022  | 17.33226467 | 3.951237479 | 5.509312741                          |
| RS-2774669        | CRC                                | 3                  | MSS        | MSS          | 8.963937777 | 16.38971654 | 4.511059736 | 4.452878041                          |
| RS-2774670        | CRC                                | 3                  | MSS        | MSS          | 7.614443128 | 15.75587351 | 2.936413691 | 4.678029437                          |
| RS-2774624        | CRC                                | 3                  | MSS        | MSS          | 7.632272607 | 15.75789558 | 3.193738313 | 4.438534294                          |
| <b>RS-2774603</b> | endometrial endometrioid carcinoma | 3                  | <b>MSS</b> | <b>MSI-H</b> | 7.044110867 | 14.25748593 | 4.684243801 | 2.359867067                          |
| RS-2774586        | endometrial endometrioid carcinoma | 3                  | MSS        | MSS          | 8.123111514 | 15.56195874 | 4.856907509 | 3.266204005                          |

|            |                                       |   |     |        |             |             |             |             |
|------------|---------------------------------------|---|-----|--------|-------------|-------------|-------------|-------------|
| RS-2774634 | endometrial<br>endometrioid carcinoma | 3 | MSS | MSS    | 6.402380712 | 14.36883764 | 3.56554565  | 2.836835062 |
| RS-2774650 | endometrial<br>endometrioid carcinoma | 3 | MSS | MSS    | 8.049829607 | 15.89583879 | 3.319946263 | 4.729883344 |
| RS-2774593 | Normal                                | 3 | MSS | Normal | 9.037988881 | 16.39429444 | 4.712681623 | 4.325307258 |
| RS-2774594 | Normal                                | 3 | MSS | Normal | 8.474956476 | 16.25044909 | 4.307754235 | 4.167202241 |
| RS-2774595 | Normal                                | 3 | MSS | Normal | 8.636660621 | 16.76162568 | 3.250278093 | 5.386382528 |
| RS-2774596 | Normal                                | 3 | MSS | Normal | 7.52627847  | 15.83898064 | 2.645751848 | 4.880526621 |
| RS-2774597 | Normal                                | 3 | MSS | Normal | 7.3838173   | 15.16519258 | 3.44735561  | 3.93646169  |
| RS-2774598 | Normal                                | 3 | MSS | Normal | 8.948277788 | 16.83764902 | 3.874595044 | 5.073682744 |
| RS-2774599 | Normal                                | 3 | MSS | Normal | 8.186021174 | 16.02901966 | 2.956504358 | 5.229516816 |
| RS-2774600 | Normal                                | 3 | MSS | Normal | 9.163962076 | 17.18198796 | 4.447064916 | 4.71689716  |
| RS-2774609 | Normal                                | 3 | MSS | Normal | 8.307516045 | 15.91182854 | 4.378848397 | 3.928667648 |
| RS-2774610 | Normal                                | 3 | MSS | Normal | 11.20617979 | 18.87381017 | 5.351771704 | 5.854408086 |
| RS-2774611 | Normal                                | 3 | MSS | Normal | 8.884167657 | 16.60491166 | 4.15518779  | 4.728979867 |
| RS-2774612 | Normal                                | 3 | MSS | Normal | 10.9136231  | 18.79492126 | 5.254743179 | 5.658879922 |
| RS-2774613 | Normal                                | 3 | MSS | Normal | 10.06825131 | 17.91390957 | 3.964977724 | 6.103273587 |
| RS-2774614 | Normal                                | 3 | MSS | Normal | 8.144820307 | 15.76798784 | 4.900014791 | 3.244805516 |
| RS-2774615 | Normal                                | 3 | MSS | Normal | 9.514636093 | 17.44084197 | 4.478705932 | 5.035930161 |
| RS-2774616 | Normal                                | 3 | MSS | Normal | 7.373045424 | 15.58226099 | 3.270195585 | 4.102849839 |
| RS-2774625 | Normal                                | 3 | MSS | Normal | 7.81618978  | 15.2043099  | 4.530136526 | 3.286053255 |
| RS-2774626 | Normal                                | 3 | MSS | Normal | 6.288134985 | 14.17422524 | 3.514728894 | 2.773406091 |
| RS-2774627 | Normal                                | 3 | MSS | Normal | 8.362500395 | 16.03527754 | 4.153673497 | 4.208826897 |
| RS-2774628 | Normal                                | 3 | MSS | Normal | 8.194076121 | 16.05825893 | 3.319262879 | 4.874813242 |
| RS-2774629 | Normal                                | 3 | MSS | Normal | 8.978947544 | 17.07724059 | 3.861793885 | 5.117153659 |
| RS-2774630 | Normal                                | 3 | MSS | Normal | 9.983685438 | 17.41304731 | 5.5607025   | 4.422982938 |
| RS-2774631 | Normal                                | 3 | MSS | Normal | 8.641716215 | 16.63072758 | 2.944926097 | 5.696790118 |
| RS-2774632 | Normal                                | 3 | MSS | Normal | 7.444171711 | 15.21608201 | 3.482182075 | 3.961989635 |
| RS-2774641 | Normal                                | 3 | MSS | Normal | 8.487374561 | 16.03633038 | 3.965932362 | 4.5214422   |
| RS-2774642 | Normal                                | 3 | MSS | Normal | 9.669498547 | 17.23773597 | 5.06112858  | 4.608369967 |
| RS-2774643 | Normal                                | 3 | MSS | Normal | 10.859552   | 18.43617171 | 5.599758824 | 5.259793176 |
| RS-2774644 | Normal                                | 3 | MSS | Normal | 9.080479264 | 16.96223639 | 3.830693347 | 5.249785917 |
| RS-2774645 | Normal                                | 3 | MSS | Normal | 9.220418635 | 16.88020999 | 5.641751728 | 3.578666907 |
| RS-2774646 | Normal                                | 3 | MSS | Normal | 8.674919223 | 16.73441812 | 4.319159907 | 4.355759317 |
| RS-2774647 | Normal                                | 3 | MSS | Normal | 9.790768781 | 17.74969065 | 3.559715747 | 6.231053033 |
| RS-2774648 | Normal                                | 3 | MSS | Normal | 9.458275491 | 17.30963475 | 3.894748549 | 5.563526942 |
| RS-2774656 | Normal                                | 3 | MSS | Normal | 10.2612038  | 16.93609401 | 6.362244389 | 3.898959414 |
| RS-2774657 | Normal                                | 3 | MSS | Normal | 8.127412818 | 15.93971789 | 4.266251365 | 3.861161453 |
| RS-2774658 | Normal                                | 3 | MSS | Normal | 9.21892691  | 16.3207977  | 6.099355658 | 3.119571251 |
| RS-2774659 | Normal                                | 3 | MSS | Normal | 8.0197359   | 16.11719467 | 3.330750713 | 4.688985187 |
| RS-2774660 | Normal                                | 3 | MSS | Normal | 7.2722113   | 15.10732479 | 3.785335827 | 3.486875474 |
| RS-2774661 | Normal                                | 3 | MSS | Normal | 7.566258168 | 15.8180344  | 3.337378924 | 4.228879244 |
| RS-2774662 | Normal                                | 3 | MSS | Normal | 10.2137994  | 17.94531396 | 5.136452254 | 5.077347148 |
| RS-2774671 | Normal                                | 3 | MSS | Normal | 8.884946272 | 16.4735685  | 4.333955667 | 4.550990605 |
| RS-2774672 | Normal                                | 3 | MSS | Normal | 9.443929592 | 17.46592032 | 3.72489962  | 5.719029972 |
| RS-2774673 | Normal                                | 3 | MSS | Normal | 6.807363211 | 15.09201944 | 2.29973341  | 4.507629801 |
| RS-2774674 | Normal                                | 3 | MSS | Normal | 7.773838695 | 15.64414528 | 3.249734584 | 4.524104111 |
| RS-2774675 | Normal                                | 3 | MSS | Normal | 9.173541057 | 17.19983566 | 3.487861294 | 5.685679763 |
| RS-2774676 | Normal                                | 3 | MSS | Normal | 7.298938089 | 15.24965177 | 2.560566773 | 4.738371316 |
| RS-2774677 | Normal                                | 3 | MSS | Normal | 12.5064456  | 20.01914496 | 6.379604952 | 6.126840648 |
| RS-2774678 | Normal                                | 3 | MSS | Normal | 8.956577208 | 17.08200226 | 3.260809579 | 5.695767629 |

**Supplementary Table 6: MSI NGS prediction in validation set. See Supplementary\_Table\_6**

**Supplementary Table 7: NGS detection of difference in number of peaks at BAT25 marker location for BAT25 unstable cases by gold standard PCR**

| Tumor      | Matched Normal | BAT25-NGS-<br>nPeaks-Tumor | BAT25-NGS-<br>nPeaks-Normal | NGS Peak<br>Difference | BAT25-PCR-<br>Peaks-Tumor | BAT25-PCR-<br>Peaks-Normal | PCR Peak<br>Difference |
|------------|----------------|----------------------------|-----------------------------|------------------------|---------------------------|----------------------------|------------------------|
| RS-2774601 | RS-2774609     | 19                         | 12                          | 7                      | 3                         | 1                          | 2                      |
| RS-2774590 | RS-2774598     | 17                         | 10                          | 7                      | 2                         | 1                          | 1                      |
| RS-2774602 | RS-2774610     | 17                         | 10                          | 7                      | 2                         | 1                          | 1                      |
| RS-2774592 | RS-2774600     | 16                         | 10                          | 6                      | 2                         | 1                          | 1                      |
| RS-2774605 | RS-2774613     | 17                         | 11                          | 6                      | 2                         | 1                          | 1                      |
| RS-2774621 | RS-2774629     | 18                         | 12                          | 6                      | 2                         | 1                          | 1                      |
| RS-2774591 | RS-2774599     | 15                         | 11                          | 4                      | 3                         | 1                          | 2                      |
| RS-2774607 | RS-2774615     | 15                         | 11                          | 4                      | 3                         | 1                          | 2                      |
| RS-2774588 | RS-2774596     | 16                         | 12                          | 4                      | 3                         | 1                          | 2                      |
| RS-2774622 | RS-2774630     | 15                         | 11                          | 4                      | 2                         | 1                          | 1                      |
| RS-2774618 | RS-2774626     | 17                         | 13                          | 4                      | 2                         | 1                          | 1                      |
| RS-2774619 | RS-2774627     | 14                         | 11                          | 3                      | 2                         | 1                          | 1                      |
| RS-2774620 | RS-2774628     | 12                         | 10                          | 2                      | 2                         | 1                          | 1                      |
| RS-2774617 | RS-2774625     | 13                         | 11                          | 2                      | 4                         | 3                          | 1                      |
| RS-2774589 | RS-2774597     | 14                         | 12                          | 2                      | 2                         | 1                          | 1                      |
| RS-2774624 | RS-2774632     | 11                         | 12                          | 1                      | 2                         | 1                          | 1                      |
| RS-2774608 | RS-2774616     | 13                         | 12                          | 1                      | 3                         | 2                          | 1                      |
| RS-2774603 | RS-2774611     | 12                         | 12                          | 0                      | 2                         | 1                          | 1                      |

**Supplementary Table 8: NGS detection of difference in number of peaks at BAT26 marker location for BAT26 Unstable cases by gold standard PCR**

| Tumor      | Matched Normal | BAT26-NGS-<br>nPeaks-Tumor | BAT26-NGS-<br>nPeaks-Normal | NGS Peak<br>Difference | BAT26-PCR-<br>Peaks-Tumor | BAT26-PCR-<br>Peaks-Normal | PCR Peak<br>Difference |
|------------|----------------|----------------------------|-----------------------------|------------------------|---------------------------|----------------------------|------------------------|
| RS-2774588 | RS-2774596     | 15                         | 7                           | 8                      | 2                         | 1                          | 1                      |
| RS-2774591 | RS-2774599     | 13                         | 7                           | 6                      | 2                         | 1                          | 1                      |
| RS-2774601 | RS-2774609     | 13                         | 7                           | 6                      | 2                         | 1                          | 1                      |
| RS-2774602 | RS-2774610     | 13                         | 7                           | 6                      | 2                         | 1                          | 1                      |
| RS-2774605 | RS-2774613     | 13                         | 7                           | 6                      | 2                         | 1                          | 1                      |
| RS-2774590 | RS-2774598     | 13                         | 8                           | 5                      | 2                         | 1                          | 1                      |
| RS-2774592 | RS-2774600     | 11                         | 7                           | 4                      | 2                         | 1                          | 1                      |
| RS-2774617 | RS-2774625     | 11                         | 7                           | 4                      | 3                         | 2                          | 1                      |
| RS-2774607 | RS-2774615     | 9                          | 6                           | 3                      | 3                         | 1                          | 2                      |
| RS-2774621 | RS-2774629     | 9                          | 6                           | 3                      | 2                         | 1                          | 1                      |
| RS-2774589 | RS-2774597     | 10                         | 7                           | 3                      | 2                         | 1                          | 1                      |
| RS-2774608 | RS-2774616     | 10                         | 7                           | 3                      | 4                         | 3                          | 1                      |
| RS-2774619 | RS-2774627     | 10                         | 7                           | 3                      | 2                         | 1                          | 1                      |
| RS-2774618 | RS-2774626     | 10                         | 8                           | 2                      | 3                         | 1                          | 2                      |
| RS-2774623 | RS-2774631     | 8                          | 7                           | 1                      | 3                         | 1                          | 2                      |
| RS-2774622 | RS-2774630     | 9                          | 8                           | 1                      | 3                         | 1                          | 2                      |
| RS-2774624 | RS-2774632     | 7                          | 8                           | 1                      | 2                         | 1                          | 1                      |
| RS-2774603 | RS-2774611     | 8                          | 7                           | 1                      | 2                         | 1                          | 1                      |
| RS-2774620 | RS-2774628     | 8                          | 7                           | 1                      | 2                         | 1                          | 1                      |
| RS-2774606 | RS-2774614     | 8                          | 8                           | 0                      | 2                         | 1                          | 1                      |

**Supplementary Table 9: Effect of percent tumor nuclei on MSI NGS calling.** See Supplementary\_Table\_9

**Supplementary Table 10: Effect of DNA (ng) Input on MSI NGS calling.** See Supplementary\_Table\_10

**Supplementary Table 11: Effect of batch size on MSI NGS calling.** See Supplementary\_Table\_11



**Supplementary Table 12: Sample level quantitation and QC data for reproducibility study**

| Sample ID     | Run | Library Yield | Depth of Coverage | mapped_reads_pct | singletons_pct |
|---------------|-----|---------------|-------------------|------------------|----------------|
| RD-5304-1     | RP1 | 85.6          | 2209              | 98.0023          | 0.279145       |
| RD-5304-2     | RP1 | 60.2          | 2020              | 96.3624          | 0.392017       |
| RD-5304-3     | RP1 | 75.9          | 2305              | 96.3624          | 0.392017       |
| RD-5311-1     | RP1 | 85.4          | 2114              | 88.6036          | 0.947926       |
| RD-5311-2     | RP1 | 109.9         | 1848              | 96.4373          | 0.357335       |
| RD-5311-3     | RP1 | 43.4          | 1459              | 96.4373          | 0.357335       |
| RD-5312-1     | RP1 | 176.1         | 2219              | 93.6922          | 0.656078       |
| RD-5312-2     | RP1 | 179.4         | 2183              | 93.6922          | 0.656078       |
| RD-5312-3     | RP1 | 138.1         | 2827              | 93.6922          | 0.656078       |
| RD-5313-1     | RP1 | 190.3         | 2672              | 94.3748          | 0.500055       |
| RD-5313-2     | RP1 | 178.8         | 2514              | 94.3748          | 0.500055       |
| RD-5313-3     | RP1 | 178.3         | 2612              | 94.3748          | 0.500055       |
| RD-5345-1     | RP1 | 55.2          | 2406              | 93.6922          | 0.656078       |
| RD-5345-2     | RP1 | 57.2          | 2080              | 92.3219          | 0.59737        |
| RD-5345-3     | RP1 | 19.3          | 952               | 92.3219          | 0.59737        |
| RD-5346-1     | RP1 | 82.9          | 3618              | 80.9851          | 1.5201         |
| RD-5346-2     | RP1 | 138.6         | 2971              | 92.9183          | 0.578603       |
| RD-5346-3     | RP1 | 156.9         | 2878              | 92.9183          | 0.578603       |
| RD-5279-R1-T1 | RP2 | 55.9          | 2422              | 93.8072          | 0.562055       |
| RD-5280-R1-T1 | RP2 | 24.2          | 1914              | 95.6796          | 0.774148       |
| RD-5281-R1-T1 | RP2 | 26.5          | 2056              | 92.8141          | 0.607963       |
| RD-5282-R1-T1 | RP2 | 56.7          | 2510              | 96.9827          | 0.795453       |
| RD-5283-R1-T1 | RP2 | 41.0          | 2400              | 92.9368          | 0.4015         |
| RD-5284-R1-T1 | RP2 | 74.2          | 2449              | 95.6963          | 0.464343       |
| RD-5285-R1-T1 | RP2 | 39.9          | 2033              | 94.9346          | 0.524148       |
| RD-5286-R1-T1 | RP2 | 115.9         | 3103              | 82.5901          | 0.538592       |
| RD-5287-R1-T1 | RP2 | 18.3          | 1855              | 95.581           | 0.633818       |
| RD-5288-R1-T1 | RP2 | 59.2          | 2497              | 93.6543          | 0.434018       |
| RD-5289-R1-T1 | RP2 | 87.1          | 2445              | 95.6963          | 0.527724       |
| RD-5290-R1-T1 | RP2 | 88.9          | 2322              | 96.626           | 0.958923       |
| RD-5291-R1-T1 | RP2 | 81.3          | 2656              | 90.8441          | 0.466897       |
| RD-5292-R1-T1 | RP2 | 102.3         | 2351              | 95.9487          | 0.703172       |
| RD-5293-R1-T1 | RP2 | 37.3          | 2142              | 96.9315          | 0.613436       |
| RD-5294-R1-T1 | RP2 | 68.6          | 2443              | 95.4313          | 0.701861       |
| RD-5295-R1-T1 | RP2 | 72.9          | 2200              | 93.2658          | 0.630016       |
| RD-5296-R1-T1 | RP2 | 61.9          | 2172              | 94.039           | 0.606404       |
| RD-5297-R1-T1 | RP2 | 72.3          | 2256              | 94.4695          | 1.03252        |
| RD-5298-R1-T1 | RP2 | 49.2          | 1883              | 90.0165          | 1.92836        |
| RD-5279-R2-T2 | RP3 | 87.7          | 2678              | 93.5683          | 0.503304       |
| RD-5280-R2-T2 | RP3 | 58.4          | 2350              | 93.4865          | 0.51102        |
| RD-5281-R2-T2 | RP3 | 66.7          | 2124              | 92.4202          | 0.659091       |
| RD-5282-R2-T2 | RP3 | 87.0          | 2806              | 91.4026          | 0.738055       |
| RD-5283-R2-T2 | RP3 | 60.2          | 2209              | 93.7032          | 0.480255       |
| RD-5284-R2-T2 | RP3 | 110.9         | 2108              | 88.3498          | 0.851301       |

|               |     |       |      |         |          |
|---------------|-----|-------|------|---------|----------|
| RD-5285-R2-T2 | RP3 | 28.9  | 1700 | 93.056  | 0.640527 |
| RD-5286-R2-T2 | RP3 | 120.9 | 2778 | 92.9624 | 0.546469 |
| RD-5287-R2-T2 | RP3 | 68.7  | 1864 | 91.835  | 0.618407 |
| RD-5288-R2-T2 | RP3 | 101.8 | 2130 | 94.391  | 0.506297 |
| RD-5289-R2-T2 | RP3 | 138.7 | 2307 | 94.5516 | 0.510076 |
| RD-5290-R2-T2 | RP3 | 157.0 | 2521 | 94.3438 | 0.526232 |
| RD-5291-R2-T2 | RP3 | 132.8 | 2398 | 93.2064 | 0.580682 |
| RD-5292-R2-T2 | RP3 | 166.2 | 2424 | 94.1598 | 0.511901 |
| RD-5293-R2-T2 | RP3 | 77.8  | 2000 | 91.3964 | 0.783085 |
| RD-5294-R2-T2 | RP3 | 108.1 | 2130 | 90.7282 | 0.74809  |
| RD-5295-R2-T2 | RP3 | 72.9  | 2196 | 93.3636 | 0.564241 |
| RD-5296-R2-T2 | RP3 | 109.9 | 2274 | 95.1988 | 0.405725 |
| RD-5297-R2-T2 | RP3 | 92.7  | 2135 | 93.0392 | 0.620059 |
| RD-5298-R2-T2 | RP3 | 56.1  | 1649 | 77.4681 | 1.90183  |
| RD-5279-R3-T1 | RP4 | 127.1 | 2964 | 90.0065 | 0.841184 |
| RD-5280-R3-T1 | RP4 | 131.7 | 2196 | 89.7662 | 0.873407 |
| RD-5281-R3-T1 | RP4 | 116.0 | 2234 | 87.8493 | 1.21544  |
| RD-5282-R3-T1 | RP4 | 95.6  | 2101 | 83.7608 | 1.48475  |
| RD-5283-R3-T1 | RP4 | 69.3  | 1732 | 81.2577 | 1.53329  |
| RD-5284-R3-T1 | RP4 | 181.0 | 2913 | 92.3211 | 0.669231 |
| RD-5285-R3-T1 | RP4 | 105.7 | 2157 | 86.0375 | 1.3195   |
| RD-5286-R3-T1 | RP4 | 159.2 | 3104 | 85.733  | 1.1636   |
| RD-5287-R3-T1 | RP4 | 49.8  | 1329 | 56.3445 | 3.36284  |
| RD-5288-R3-T1 | RP4 | 83.3  | 1845 | 85.3378 | 1.20293  |
| RD-5289-R3-T1 | RP4 | 87.2  | 1756 | 77.1079 | 2.02875  |
| RD-5290-R3-T1 | RP4 | 155.1 | 2632 | 90.8344 | 0.871477 |
| RD-5291-R3-T1 | RP4 | 35.4  | 1235 | 88.8392 | 0.906933 |
| RD-5292-R3-T1 | RP4 | 72.0  | 1667 | 91.4023 | 0.749126 |
| RD-5293-R3-T1 | RP4 | 16.9  | 1221 | 83.7864 | 1.53784  |
| RD-5294-R3-T1 | RP4 | 33.6  | 1232 | 81.6973 | 1.38648  |
| RD-5295-R3-T1 | RP4 | 22.7  | 1370 | 87.9562 | 1.00781  |
| RD-5296-R3-T1 | RP4 | 103.4 | 2331 | 93.9305 | 0.543633 |
| RD-5297-R3-T1 | RP4 | 50.5  | 2818 | 82.2834 | 1.64231  |
| RD-5298-R3-T1 | RP4 | 23.8  | 1982 | 85.0088 | 1.3701   |

**Supplementary Table 13: MSI NGS peak number and mean indel length for reproducibility runs.**  
See Supplementary\_Table\_13

**Supplementary Table 14: NTC nM library yield and length across all runs**

| Sample ID | Run ID | Run Description                                     | Library Yield (nM) | Library Length (Tape Station) |
|-----------|--------|-----------------------------------------------------|--------------------|-------------------------------|
| NTC-CV1   | CV1    | Validation set                                      | 2.2                | 149                           |
| NTC-CV2   | CV2    | Validation set                                      | 8.6                | 189                           |
| NTC-CV3   | CV3    | Validation set                                      | 5.7                | 156                           |
| NTC-CV4   | CV4    | Validation set                                      | 4.8                | 154                           |
| NTC-CV5   | CV5    | Validation set                                      | 7.3                | 147                           |
| NTC-AV1   | AV1    | Standard Batch size ( $n = 20$ )                    | 2.2                | 149                           |
| NTC-AV2   | AV2    | Batch size ( $n = 40$ )                             | 1.9                | 157                           |
| NTC-AV3   | AV3    | Batch size ( $n = 10$ )                             | 3.8                | 150                           |
| NTC-AV4   | AV4    | Batch size ( $n = 5$ )                              | 3.9                | 151                           |
| NTC-AV5   | AV5    | DNA input (50, 20, 10, 5 ng)                        | 4.4                | 148                           |
| NTC-AV6   | AV6    | Percent Tumor Nuclei (70, 52.5, 35, 28, 21, 14, 7%) | 1.6                | 218                           |
| NTC-AV7   | AV7    | Percent Tumor Nuclei (90, 67.5, 45, 36, 27, 18, 9%) | 2.1                | 194                           |
| NTC-RP1   | RP1    | Reproducibility (Intra-Run 1)                       | 1.8                | 152                           |
| NTC-RP2   | RP2    | Reproducibility (Inter-Run 2, tech 1)               | 2.2                | 149                           |
| NTC-RP3   | RP3    | Reproducibility (Inter-Run 3, tech 2)               | 3                  | 148                           |
| NTC-RP4   | RP4    | Reproducibility (Inter-Run 4, tech 1)               | 8.2                | 150                           |
|           |        | Mean                                                | 4                  | 161                           |
|           |        | Standard Deviation                                  | 2.3                | 22                            |
|           |        | Mean + 2x SD                                        | 8.5                | 206                           |

**Supplementary Table 15: MSI-CTL and MSS-CTL indel number, mean indel length and QC parameters. See Supplementary\_Table\_15**

**Supplementary Table 16: Summary of MSI NGS run level parameters and QC thresholds**

| Run Name                                                          | Run Description                                        | Parameter                       |                    |                 |              |
|-------------------------------------------------------------------|--------------------------------------------------------|---------------------------------|--------------------|-----------------|--------------|
|                                                                   |                                                        | Density<br>(K/mm <sup>2</sup> ) | Clusters<br>PF (%) | Reads<br>PF (M) | % ≥<br>Q30   |
| Accuracy Run 1/Analytical Validity<br>Run 1/Reproducibility Run 2 | Accuracy set                                           | 1054                            | 88.49              | 10              | 81.51        |
| Accuracy Run 2                                                    | Accuracy set                                           | 1111                            | 76.91              | 8.82            | 81.86        |
| Accuracy Run 3                                                    | Accuracy set                                           | 1096                            | 81.75              | 9.46            | 77.39        |
| Accuracy Run 4                                                    | Accuracy set                                           | 1064                            | 86.52              | 9.8             | 75.45        |
| Accuracy Run 5                                                    | Accuracy set                                           | 1086                            | 86.17              | 10.02           | 81.21        |
| Accuracy Run 1/Analytical Validity<br>Run 1/Reproducibility Run 2 | Standard Batch size ( <i>n</i> = 20)                   | 1054                            | 88.49              | 10              | 81.51        |
| Analytical Validity Run 2                                         | Batch size ( <i>n</i> = 40)                            | 1156                            | 83.99              | 10.24           | 81.40        |
| Analytical Validity Run 3                                         | Batch size ( <i>n</i> = 10)                            | 1100                            | 87.07              | 10.28           | 82.70        |
| Analytical Validity Run 4                                         | Batch size ( <i>n</i> = 5)                             | 1143                            | 85.79              | 10.38           | 83.14        |
| Analytical Validity Run 5                                         | DNA input (50, 20, 10, 5 ng)                           | 1140                            | 84.08              | 10.16           | 80.68        |
| Analytical Validity Run 6                                         | Percent Tumor Nuclei<br>(70, 52.5, 35, 28, 21, 14, 7%) | 1129                            | 84.82              | 10.16           | 79.69        |
| Analytical Validity Run 7                                         | Percent Tumor Nuclei<br>(90, 67.5, 45, 36, 27, 18, 9%) | 1049                            | 88.29              | 9.96            | 79.88        |
| Reproducibility Run 1                                             | Reproducibility (Intra-Run 1)                          | 1069                            | 86.45              | 9.72            | 81.08        |
| Accuracy Run 1/Analytical Validity<br>Run 1/Reproducibility Run 2 | Reproducibility<br>(Inter-Run 2, tech 1)               | 1054                            | 88.49              | 10              | 81.51        |
| Reproducibility Run 3                                             | Reproducibility<br>(Inter-Run 3, tech 2)               | 1117                            | 85.22              | 9.98            | 80.40        |
| Reproducibility Run 4                                             | Reproducibility<br>(Inter-Run 4, tech 1)               | 1022                            | 88.75              | 9.76            | 79.48        |
|                                                                   | <b>AVERAGE</b>                                         | 1090.25                         | 85.71              | 9.92            | 80.55        |
|                                                                   | <b>SD</b>                                              | 38.58                           | 2.98               | 0.36            | 1.87         |
|                                                                   | <b>AVERAGE - 2SD</b>                                   | <b>1013.09</b>                  | <b>79.74</b>       | <b>9.20</b>     | <b>76.82</b> |
|                                                                   | <b>MIN</b>                                             | 1022                            | 76.91              | 8.82            | 75.445       |
|                                                                   | <b>MAX</b>                                             | 1156                            | 88.75              | 10.38           | 83.14        |

**Supplementary Table 17: Sample level quantitation and QC data for accuracy study and performance parameter development**

| Sample ID | Run  | Library Yield | Depth of Coverage | mapped_reads_pct | singletons_pct |
|-----------|------|---------------|-------------------|------------------|----------------|
| RD-5289   | Run1 | 87.1          | 2445              | 95.6963          | 0.5277         |
| RD-5284   | Run1 | 74.2          | 2449              | 96.6260          | 0.4643         |
| RD-5290   | Run1 | 88.9          | 2322              | 90.8441          | 0.9589         |
| RD-5291   | Run1 | 81.3          | 2656              | 95.9487          | 0.4669         |
| RD-5292   | Run1 | 102.3         | 2351              | 93.8072          | 0.7032         |
| RD-5279   | Run1 | 55.9          | 2422              | 95.6796          | 0.5621         |
| RD-5280   | Run1 | 24.2          | 1914              | 92.8141          | 0.7741         |
| RD-5285   | Run1 | 39.9          | 2033              | 95.1607          | 0.5241         |
| RD-5281   | Run1 | 26.5          | 2056              | 94.9346          | 0.6080         |
| RD-5286   | Run1 | 115.9         | 3103              | 95.5810          | 0.5386         |
| RD-5287   | Run1 | 18.3          | 1855              | 93.6543          | 0.6338         |
| RD-5288   | Run1 | 59.2          | 2497              | 96.9827          | 0.4340         |
| RD-5282   | Run1 | 56.7          | 2510              | 92.9368          | 0.7955         |
| RD-5283   | Run1 | 41.0          | 2400              | 96.9315          | 0.4015         |
| RD-5293   | Run1 | 37.3          | 2142              | 95.4313          | 0.6134         |
| RD-5294   | Run1 | 68.6          | 2443              | 93.2658          | 0.7019         |
| RD-5295   | Run1 | 72.9          | 2200              | 94.0390          | 0.6300         |
| RD-5296   | Run1 | 61.9          | 2172              | 94.4695          | 0.6064         |
| RD-5297   | Run1 | 72.3          | 2256              | 90.0165          | 1.0325         |
| RD-5298   | Run1 | 49.2          | 1883              | 79.9581          | 1.9284         |
| RD-5302   | Run2 | 89.2          | 2070              | 95.8442          | 0.4610         |
| RD-5303   | Run2 | 52.3          | 1744              | 89.2734          | 0.7584         |
| RD-5304   | Run2 | 67.0          | 1908              | 92.4191          | 0.6206         |
| RD-5306   | Run2 | 63.9          | 1759              | 93.3858          | 0.5736         |
| RD-5307   | Run2 | 66.9          | 1996              | 93.1930          | 0.5451         |
| RD-5299   | Run2 | 90.4          | 1760              | 94.5840          | 0.4801         |
| RD-5308   | Run2 | 47.0          | 1773              | 92.4612          | 0.5528         |
| RD-5309   | Run2 | 35.4          | 1958              | 95.0031          | 0.4884         |
| RD-5300   | Run2 | 72.8          | 2803              | 96.5043          | 0.3896         |
| RD-5310   | Run2 | 94.9          | 2224              | 94.5431          | 0.5075         |
| RD-5311   | Run2 | 54.8          | 1893              | 91.6578          | 0.7098         |
| RD-5312   | Run2 | 98.0          | 2196              | 96.4707          | 0.3329         |
| RD-5313   | Run2 | 94.1          | 2274              | 95.8438          | 0.3562         |
| RD-5314   | Run2 | 23.5          | 1944              | 93.6112          | 0.5666         |
| RD-5315   | Run2 | 44.6          | 1773              | 94.9354          | 0.4260         |
| RD-5316   | Run2 | 149.6         | 2608              | 96.8891          | 0.3282         |
| RD-5317   | Run2 | 104.9         | 3485              | 97.3530          | 0.2983         |
| RD-5318   | Run2 | 96.1          | 2844              | 94.2347          | 0.5668         |
| RD-5319   | Run2 | 89.0          | 2824              | 95.6868          | 0.4439         |
| RD-5301   | Run2 | 29.0          | 1510              | 91.1965          | 0.7982         |
| RD-5320   | Run3 | 56.9          | 2080              | 89.4068          | 0.8199         |
| RD-5321   | Run3 | 29.6          | 3061              | 94.8674          | 0.4205         |
| RD-5322   | Run3 | 25.7          | 1599              | 83.9720          | 1.2015         |
| RD-5323   | Run3 | 98.4          | 2574              | 97.5283          | 0.2924         |
| RD-5324   | Run3 | 78.7          | 2275              | 92.7665          | 0.5371         |
| RD-5325   | Run3 | 41.1          | 1925              | 92.6724          | 0.6175         |
| RD-5326   | Run3 | 48.7          | 2496              | 95.3086          | 0.4872         |
| RD-5327   | Run3 | 24.8          | 1467              | 89.9646          | 0.7283         |
| RD-5328   | Run3 | 27.4          | 1405              | 88.5308          | 0.8478         |
| RD-5329   | Run3 | 23.7          | 2576              | 94.1691          | 0.4766         |
| RD-5330   | Run3 | 57.1          | 2488              | 94.1054          | 0.5153         |

|                     |      |       |       |         |        |
|---------------------|------|-------|-------|---------|--------|
| RD-5331             | Run3 | 20.3  | 1618  | 83.7121 | 1.3055 |
| RD-5332             | Run3 | 58.2  | 1603  | 79.8898 | 1.4677 |
| RD-5333             | Run3 | 27.9  | 731   | 39.7917 | 4.3887 |
| RD-5334             | Run3 | 6.8   | 770   | 80.9950 | 1.6618 |
| RD-5335             | Run3 | 18.7  | 936   | 78.1309 | 1.5849 |
| RD-5336             | Run3 | 49.5  | 1994  | 95.7611 | 0.3776 |
| RD-5337             | Run3 | 23.1  | 1722  | 88.5739 | 0.8375 |
| RD-5338             | Run3 | 52.1  | 1554  | 72.4677 | 2.1349 |
| RD-5339             | Run3 | 54.6  | 1999  | 90.1253 | 0.8890 |
| RD-5344             | Run4 | 120.7 | 2701  | 90.8337 | 0.6765 |
| RD-5345             | Run4 | 55.2  | 1864  | 85.3128 | 1.0213 |
| RD-5340             | Run4 | 39.8  | 1883  | 84.1275 | 1.0109 |
| RD-5341             | Run4 | 21.7  | 2294  | 90.7748 | 0.6156 |
| RD-5342             | Run4 | 24.7  | 1817  | 89.9862 | 0.7216 |
| RD-5346             | Run4 | 64.6  | 2499  | 89.6596 | 0.8407 |
| RD-5350             | Run4 | 12.4  | 1227  | 72.2236 | 1.7579 |
| RD-5351             | Run4 | 51.6  | 1683  | 72.5801 | 1.8459 |
| RD-5343             | Run4 | 10.1  | 916   | 76.1318 | 1.5568 |
| RD-5347             | Run4 | 37.6  | 925   | 67.0085 | 1.9294 |
| RD-5352             | Run4 | 14.8  | 738   | 87.4512 | 0.7545 |
| RD-5353             | Run4 | 45.1  | 1304  | 90.6511 | 0.6064 |
| RD-5354             | Run4 | 7.2   | 1135  | 74.3379 | 1.8835 |
| RD-5355             | Run4 | 28.4  | 1841  | 91.8235 | 0.5887 |
| RD-5356             | Run4 | 5.4   | 1269  | 83.1393 | 1.0796 |
| RD-5357             | Run4 | 24.3  | 1423  | 90.6523 | 0.6720 |
| RD-5358             | Run4 | 18.7  | 915   | 82.4122 | 1.0721 |
| RD-5359             | Run4 | 7.5   | 1037  | 72.9838 | 1.7214 |
| RD-5348             | Run4 | 18.6  | 735   | 51.2817 | 2.8618 |
| RD-5349             | Run4 | 19.6  | 1055  | 70.1749 | 1.8667 |
| RD-5370             | Run5 | 95.0  | 2760  | 95.8500 | 0.3509 |
| RD-5379             | Run5 | 9.8   | 1736  | 70.7076 | 2.5731 |
| RD-5380             | Run5 | 40.1  | 2263  | 86.0271 | 1.2503 |
| RD-5369             | Run5 | 47.6  | 1978  | 91.4740 | 0.6302 |
| RD-5371             | Run5 | 31.4  | 1991  | 91.6757 | 0.7474 |
| RD-5372             | Run5 | 11.6  | 1863  | 84.3992 | 1.3962 |
| RD-5373             | Run5 | 75.0  | 2393  | 94.5042 | 0.4462 |
| RD-5374             | Run5 | 94.5  | 2675  | 93.2288 | 0.5616 |
| RD-5375             | Run5 | 27.3  | 2058  | 93.2955 | 0.6381 |
| RD-5376             | Run5 | 15.2  | 2050  | 81.5171 | 1.4221 |
| RD-5377             | Run5 | 68.2  | 2921  | 92.5768 | 0.6135 |
| RD-5378             | Run5 | 103.7 | 3141  | 95.1563 | 0.4346 |
| RD-5360             | Run5 | 77.5  | 1968  | 91.1661 | 0.7040 |
| RD-5361             | Run5 | 101.0 | 2158  | 92.8090 | 0.5722 |
| RD-5363             | Run5 | 99.7  | 2971  | 92.3334 | 0.7342 |
| RD-5362             | Run5 | 40.4  | 2223  | 89.6913 | 0.8471 |
| RD-5364             | Run5 | 71.2  | 2225  | 93.5225 | 0.5050 |
| RD-5365             | Run5 | 66.4  | 1959  | 92.4599 | 0.6009 |
| RD-5366             | Run5 | 53.6  | 1810  | 92.9167 | 0.6605 |
| RD-5368             | Run5 | 74.0  | 2449  | 92.1690 | 0.6231 |
| Average             |      | 54    | 2012  | 89.0363 | 0.8710 |
| Standard Deviation  |      | 31    | 582   | 9.4420  | 0.6194 |
| MIN                 |      | 5     | 731   | 39.7917 | 0.2924 |
| MAX                 |      | 150   | 3485  | 97.5283 | 4.3887 |
| Average +/- 2(3) SD |      |       | > 500 | 70.1524 | 1.7481 |

**Supplementary Table 18: List of samples in the gold standard 100 cohort with tumor type, site of tissue collection, tumor characteristics and PCR/IHC data.** See Supplementary\_Table\_18

**Supplementary Table 19: MSI NGS vs. MSI-PCR concordance for accuracy study.** See Supplementary\_Table\_19

**Supplementary Table 20: Summary of MSI-NGS quality control parameters**

| Test Mode | Level  | Parameter                                    | Application     | Rule                                 | Metric                                    | Value        |
|-----------|--------|----------------------------------------------|-----------------|--------------------------------------|-------------------------------------------|--------------|
| MSI-NGS   | Sample | Standard ng input                            | Threshold       | $\geq 20$ ng yield                   | ng                                        | $\geq 20$    |
| MSI-NGS   | Sample | mapped_reads_pct                             | Threshold       | $\geq$ mean -2SD from validation     | Percentage                                | $\geq 70.5$  |
| MSI-NGS   | Sample | singletons_pct                               | Threshold       | $\geq$ mean +3SD from validation     | Percentage                                | $\leq 1.75$  |
| MSI-NGS   | Sample | Coverage                                     | Threshold       | $\geq 500$ x per validation          | Number                                    | $\geq 500$   |
| MSI-NGS   | Sample | Sample library generation yield              | Trend/Threshold | $\geq$ NTC mean +2SD from validation | nM                                        | $\geq 8.5$   |
| MSI-NGS   | Run    | NTC DNA Run Control library Construct        | Trend/Threshold | Amplicon size                        | bp                                        | $< 300$      |
| MSI-NGS   | Run    | MSI-CTL Prediction score/ Cluster assignment | Trend/Threshold | 2                                    | Score                                     | MSI          |
| MSI-NGS   | Run    | MSS-CTL Prediction score/ Cluster assignment | Trend/Threshold | 3                                    | Score                                     | MSS          |
| MSI-NGS   | Run    | Run cluster density                          | Trend/Threshold | Predefined Illumina metric           | Density (K/mm <sup>2</sup> )              | 500K–1300K   |
| MSI-NGS   | Run    | Run clusters passing filter                  | Trend/Threshold | $\geq$ mean -2SD from validation     | Clusters PF (%)                           | $\geq 79.74$ |
| MSI-NGS   | Run    | Total reads passing filter                   | Trend/Threshold | $\geq$ mean -2SD from validation     | Reads PF (M)                              | $\geq 9.20$  |
| MSI-NGS   | Run    | Probability of Incorrect Base Call           | Trend/Threshold | $\geq$ mean -2SD from validation     | $\% \geq Q30$<br>Average (Read 1, Read 4) | $\geq 76.82$ |
